# Supplementary material for: Molecular Phylogeny and Evolution of Parabasalia with Improved Taxon Sampling and New Protein Markers of Actin and Elongation Factor-1α
Source: PubMed Central journal article supplement (PMC3253790; doi:10.1371/journal.pone.0029938), 2012-01-09

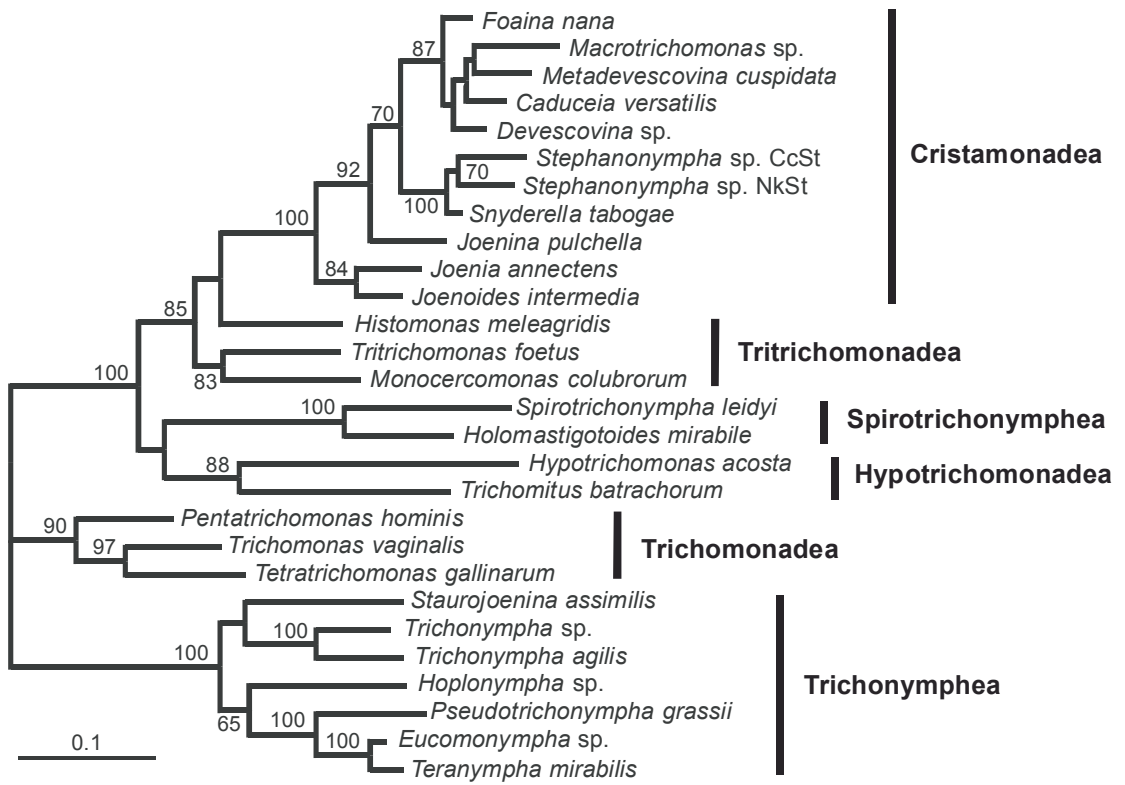

Supplement: pone.0029938.s002.pdf [file pone.0029938.s002.pdf]
